# Supplementary material
Source: PubMed Central journal article supplement (PMC5511091)
Supplement: NIHMS864056-supplement-11136_2017_1547_MOESM1_ESM.pdf [file NIHMS864056-supplement-11136_2017_1547_MOESM1_ESM.pdf]

| Supplemental table 1: NEI-VFQ Individual Item Scores for SST Participants in Whom CNV Developed in the Second Eye Before the last SST examination, Comparing Scores from (1) Baseline to prior to CNV diagnosis, and (2) Prior to and following CNV diagnosis |    |          |       |              |                   |                                      |       |           |               |                   |
|---------------------------------------------------------------------------------------------------------------------------------------------------------------------------------------------------------------------------------------------------------------|----|----------|-------|--------------|-------------------|--------------------------------------|-------|-----------|---------------|-------------------|
| Comparison of mean NEI-VFQ scores adjusted for Changes in SF-36 component scores                                                                                                                                                                              |    |          |       |              |                   |                                      |       |           |               |                   |
| Baseline to prior to CNV diagnosis                                                                                                                                                                                                                            |    |          |       |              |                   | Prior to and following CNV diagnosis |       |           |               |                   |
| VFQ-39 Items                                                                                                                                                                                                                                                  | N  | Baseline | Prior | p-value*     | Adjusted p-value† | N                                    | Prior | Following | p-value*      | Adjusted p-value† |
| vfq_eyesight                                                                                                                                                                                                                                                  | 66 | 2.95     | 3.06  | 0.44         | 1.00              | 75                                   | 3.00  | 3.65      | <0.0001       | <0.004            |
| vfq_worry_eyesight                                                                                                                                                                                                                                            | 66 | 3.03     | 2.84  | 0.32         | 1.00              | 75                                   | 2.92  | 2.93      | 0.96          | 1.00              |
| vfq_eye_pain                                                                                                                                                                                                                                                  | 66 | 1.78     | 1.48  | <b>0.02</b>  | 1.00              | 75                                   | 1.71  | 1.52      | 0.16          | 1.00              |
| vfq_newspapers                                                                                                                                                                                                                                                | 66 | 2.57     | 2.58  | 0.95         | 1.00              | 75                                   | 2.58  | 3.72      | <0.0001       | <0.004            |
| vfq_hobbies                                                                                                                                                                                                                                                   | 66 | 2.45     | 2.51  | 0.72         | 1.00              | 75                                   | 2.48  | 3.17      | <0.0001       | <0.004            |
| vfq_crowded_shelf                                                                                                                                                                                                                                             | 66 | 2.14     | 2.13  | 0.96         | 1.00              | 75                                   | 2.09  | 2.72      | <0.0001       | <0.004            |
| vfq_street_signs                                                                                                                                                                                                                                              | 66 | 2.46     | 2.49  | 0.86         | 1.00              | 75                                   | 2.38  | 3.07      | <b>0.0002</b> | <b>0.009</b>      |
| vfq_steps_curbs                                                                                                                                                                                                                                               | 66 | 2.35     | 2.44  | 0.59         | 1.00              | 75                                   | 2.46  | 2.49      | 0.82          | 1.00              |
| vfq_noticing_objects                                                                                                                                                                                                                                          | 66 | 1.91     | 1.82  | 0.56         | 1.00              | 75                                   | 1.92  | 2.12      | 0.15          | 1.00              |
| vfq_seeing_react                                                                                                                                                                                                                                              | 65 | 1.55     | 1.62  | 0.58         | 1.00              | 75                                   | 1.70  | 2.13      | <b>0.002</b>  | 0.09              |
| vfq_matching_clothes                                                                                                                                                                                                                                          | 66 | 1.50     | 1.45  | 0.72         | 1.00              | 75                                   | 1.57  | 1.88      | <b>0.05</b>   | 1.00              |
| vfq_visiting                                                                                                                                                                                                                                                  | 66 | 1.52     | 1.71  | 0.23         | 1.00              | 75                                   | 1.72  | 2.01      | 0.09          | 1.00              |
| vfq_going_out                                                                                                                                                                                                                                                 | 66 | 2.27     | 2.46  | 0.46         | 1.00              | 74                                   | 2.32  | 3.25      | <b>0.0001</b> | <b>0.004</b>      |
| vfq_driving_car                                                                                                                                                                                                                                               | 66 | 1.13     | 1.20  | 0.30         | 1.00              | 75                                   | 1.15  | 1.66      | <0.0001       | <0.004            |
| vfq_never_or_given_up                                                                                                                                                                                                                                         | 8  | 1.66     | 1.34  | 0.27         | 1.00              | 11                                   | 1.55  | 1.64      | 0.64          | 1.00              |
| vfq_reason_gave_up_driving                                                                                                                                                                                                                                    | 3  | 1.87     | 1.46  | NA           | NA                | 6                                    | 1.14  | 1.20      | NA            | NA                |
| vfq_difficulty_driving                                                                                                                                                                                                                                        | 52 | 1.47     | 1.36  | 0.40         | 1.00              | 26                                   | 1.56  | 1.51      | 0.79          | 1.00              |
| vfq_night_driving                                                                                                                                                                                                                                             | 52 | 3.17     | 3.26  | 0.73         | 1.00              | 26                                   | 3.31  | 4.04      | 0.06          | 1.00              |
| vfq_accomplish_less                                                                                                                                                                                                                                           | 64 | 3.52     | 3.41  | 0.59         | 1.00              | 74                                   | 3.42  | 2.70      | <b>0.0003</b> | <b>0.01</b>       |
| vfq_limited_length                                                                                                                                                                                                                                            | 65 | 4.25     | 4.11  | 0.41         | 1.00              | 75                                   | 3.98  | 3.48      | <b>0.006</b>  | 0.27              |
| vfq_pain                                                                                                                                                                                                                                                      | 66 | 4.56     | 4.67  | 0.39         | 1.00              | 75                                   | 4.47  | 4.59      | 0.37          | 1.00              |
| vfq_stay_home                                                                                                                                                                                                                                                 | 66 | 4.55     | 4.24  | 0.09         | 1.00              | 75                                   | 4.39  | 3.57      | <b>0.0005</b> | <b>0.02</b>       |
| vfq_frustrated                                                                                                                                                                                                                                                | 66 | 3.58     | 3.30  | 0.26         | 1.00              | 75                                   | 3.38  | 2.82      | <b>0.02</b>   | 0.79              |
| vfq_less_control                                                                                                                                                                                                                                              | 64 | 3.76     | 3.46  | 0.20         | 1.00              | 75                                   | 3.43  | 2.80      | <b>0.009</b>  | 0.39              |
| vfq_rely_other_people                                                                                                                                                                                                                                         | 66 | 4.23     | 4.01  | 0.27         | 1.00              | 75                                   | 3.90  | 3.13      | <b>0.0005</b> | <b>0.02</b>       |
| vfq_need_help                                                                                                                                                                                                                                                 | 66 | 4.18     | 4.00  | 0.40         | 1.00              | 75                                   | 4.04  | 3.17      | <0.0001       | <0.004            |
| vfq_embarrass                                                                                                                                                                                                                                                 | 66 | 4.37     | 4.25  | 0.50         | 1.00              | 75                                   | 4.37  | 3.91      | <b>0.02</b>   | 0.72              |
| vfq_overall_health                                                                                                                                                                                                                                            | 63 | 7.79     | 7.49  | 0.18         | 1.00              | 72                                   | 7.71  | 7.67      | 0.83          | 1.00              |
| vfq_rate_eyesight                                                                                                                                                                                                                                             | 64 | 6.05     | 6.14  | 0.78         | 1.00              | 72                                   | 6.23  | 4.92      | <b>0.0001</b> | <b>0.004</b>      |
| vfq_small_print                                                                                                                                                                                                                                               | 66 | 2.92     | 2.90  | 0.91         | 1.00              | 75                                   | 2.91  | 3.77      | <0.0001       | <0.004            |
| vfq_figuring_bills                                                                                                                                                                                                                                            | 65 | 2.00     | 2.03  | 0.87         | 1.00              | 75                                   | 1.97  | 3.40      | <0.0001       | <0.004            |
| vfq_styling                                                                                                                                                                                                                                                   | 66 | 1.66     | 1.67  | 0.94         | 1.00              | 75                                   | 1.65  | 1.98      | <b>0.02</b>   | 0.84              |
| vfq_recognizing                                                                                                                                                                                                                                               | 66 | 1.92     | 1.99  | 0.72         | 1.00              | 75                                   | 1.97  | 2.83      | <0.0001       | <0.004            |
| vfq_sports                                                                                                                                                                                                                                                    | 66 | 2.21     | 2.39  | 0.42         | 1.00              | 75                                   | 2.40  | 3.32      | <0.0001       | <0.004            |
| vfq_television                                                                                                                                                                                                                                                | 66 | 1.99     | 1.73  | 0.07         | 1.00              | 75                                   | 1.78  | 2.74      | <0.0001       | <0.004            |
| vfq_entertaining                                                                                                                                                                                                                                              | 66 | 1.33     | 1.46  | 0.34         | 1.00              | 75                                   | 1.42  | 1.87      | <b>0.003</b>  | 0.13              |
| vfq_driving_difficult_cond                                                                                                                                                                                                                                    | 51 | 2.87     | 2.62  | 0.31         | 1.00              | 26                                   | 2.75  | 3.37      | 0.06          | 1.00              |
| vfq_help_from_others                                                                                                                                                                                                                                          | 66 | 4.23     | 4.14  | 0.61         | 1.00              | 75                                   | 4.05  | 3.22      | <0.0001       | <0.004            |
| vfq_things_you_can_do                                                                                                                                                                                                                                         | 66 | 3.89     | 3.82  | 0.74         | 1.00              | 75                                   | 3.89  | 3.02      | <0.0001       | <0.004            |
| vfq_irritable                                                                                                                                                                                                                                                 | 66 | 4.03     | 4.29  | 0.19         | 1.00              | 75                                   | 4.10  | 3.98      | 0.50          | 1.00              |
| vfq_dont_go_out                                                                                                                                                                                                                                               | 66 | 4.50     | 4.35  | 0.44         | 1.00              | 75                                   | 4.59  | 3.85      | <b>0.0004</b> | <b>0.02</b>       |
| vfq_eyesight_next_year                                                                                                                                                                                                                                        | 59 | 2.63     | 2.85  | 0.21         | 1.00              | 71                                   | 2.93  | 2.95      | 0.89          | 1.00              |
| vfq_eyesight_worse                                                                                                                                                                                                                                            | 63 | 3.24     | 3.37  | 0.51         | 1.00              | 75                                   | 3.31  | 3.21      | 0.61          | 1.00              |
| vfq_eyesight_better                                                                                                                                                                                                                                           | 65 | 2.71     | 3.32  | <b>0.004</b> | 0.19              | 75                                   | 3.10  | 3.33      | 0.28          | 1.00              |

\* Multivariable linear regression model

† Bonferroni adjustment for multiple comparisons and for associated changes in physical and mental health component summaries from the SF-36 as a proxy for changes in medical co-morbidities

Bold font indicates statistical significance (p value < 0.05)
