# Supplementary material
Source: PubMed Central journal article supplement (PMC5511091)
Supplement: NIHMS864056-supplement-11136_2017_1547_MOESM2_ESM.pdf [file NIHMS864056-supplement-11136_2017_1547_MOESM2_ESM.pdf]

| Supplemental table 2: HADS Individual Item Scores for SST Participants in Whom CNV Developed in the Second Eye                              |    |               |                 |            |              |             |                    |                                      |            |              |                |                  |              |                    |  |
|---------------------------------------------------------------------------------------------------------------------------------------------|----|---------------|-----------------|------------|--------------|-------------|--------------------|--------------------------------------|------------|--------------|----------------|------------------|--------------|--------------------|--|
| Before the last SST examination, Comparing Scores from (1) Baseline to prior to CNV diagnosis, and (2) Prior to and following CNV diagnosis |    |               |                 |            |              |             |                    |                                      |            |              |                |                  |              |                    |  |
| Comparison of mean and median HADS scores                                                                                                   |    |               |                 |            |              |             |                    |                                      |            |              |                |                  |              |                    |  |
| Baseline to prior to CNV diagnosis                                                                                                          |    |               |                 |            |              |             |                    | Prior to and following CNV diagnosis |            |              |                |                  |              |                    |  |
| HADS Item                                                                                                                                   | N  | Baseline Mean | Baseline Median | Prior Mean | Prior Median | p-value*    | Adjusted p-value** | N                                    | Prior Mean | Prior Median | Following Mean | Following Median | p-value*     | Adjusted p-value** |  |
| <b>hads_tense</b>                                                                                                                           | 66 | 3.44          | 4.00            | 3.50       | 4.00         | 0.50        | 1.00               | 77                                   | 3.43       | 4.00         | 3.55           | 4.00             | 0.17         | 1.00               |  |
| <b>hads_enjoy</b>                                                                                                                           | 66 | 1.47          | 1.00            | 1.61       | 1.00         | 0.32        | 1.00               | 77                                   | 1.58       | 1.00         | 1.82           | 2.00             | <b>0.04</b>  | 0.53               |  |
| <b>hads_awful</b>                                                                                                                           | 66 | 3.56          | 4.00            | 3.64       | 4.00         | 0.43        | 1.00               | 77                                   | 3.62       | 4.00         | 3.66           | 4.00             | 0.60         | 1.00               |  |
| <b>hads_laugh</b>                                                                                                                           | 66 | 1.33          | 1.00            | 1.32       | 1.00         | 0.89        | 1.00               | 77                                   | 1.36       | 1.00         | 1.30           | 1.00             | 0.53         | 1.00               |  |
| <b>hads_worrying</b>                                                                                                                        | 62 | 3.52          | 4.00            | 3.39       | 3.00         | 0.23        | 1.00               | 66                                   | 3.30       | 3.00         | 3.59           | 4.00             | <b>0.006</b> | 0.08               |  |
| <b>hads_cheerful</b>                                                                                                                        | 66 | 3.83          | 4.00            | 3.68       | 4.00         | <b>0.05</b> | 0.69               | 77                                   | 3.79       | 4.00         | 3.71           | 4.00             | 0.32         | 1.00               |  |
| <b>hads_relaxed</b>                                                                                                                         | 66 | 1.67          | 2.00            | 1.56       | 1.00         | 0.20        | 1.00               | 77                                   | 1.53       | 1.00         | 1.65           | 2.00             | 0.25         | 1.00               |  |
| <b>hads_slowed_down</b>                                                                                                                     | 66 | 2.94          | 3.00            | 2.92       | 3.00         | 0.88        | 1.00               | 77                                   | 2.94       | 3.00         | 2.86           | 3.00             | 0.50         | 1.00               |  |
| <b>hads_butterflies</b>                                                                                                                     | 66 | 1.44          | 1.00            | 1.33       | 1.00         | 0.20        | 1.00               | 77                                   | 1.34       | 1.00         | 1.30           | 1.00             | 0.57         | 1.00               |  |
| <b>hads_appearance</b>                                                                                                                      | 66 | 3.82          | 4.00            | 3.85       | 4.00         | 0.66        | 1.00               | 77                                   | 3.84       | 4.00         | 3.91           | 4.00             | 0.23         | 1.00               |  |
| <b>hads_restless</b>                                                                                                                        | 66 | 3.33          | 3.00            | 3.38       | 4.00         | 0.63        | 1.00               | 77                                   | 3.39       | 4.00         | 3.29           | 3.00             | 0.30         | 1.00               |  |
| <b>hads_look_forward</b>                                                                                                                    | 66 | 1.45          | 1.00            | 1.50       | 1.00         | 0.66        | 1.00               | 77                                   | 1.49       | 1.00         | 1.47           | 1.00             | 0.78         | 1.00               |  |
| <b>hads_panic</b>                                                                                                                           | 66 | 3.64          | 4.00            | 3.70       | 4.00         | 0.42        | 1.00               | 77                                   | 3.66       | 4.00         | 3.64           | 4.00             | 0.73         | 1.00               |  |
| <b>hads_book</b>                                                                                                                            | 66 | 1.15          | 1.00            | 1.33       | 1.00         | 0.08        | 1.00               | 77                                   | 1.43       | 1.00         | 1.65           | 1.00             | 0.08         | 1.00               |  |
| * Paired t-test                                                                                                                             |    |               |                 |            |              |             |                    |                                      |            |              |                |                  |              |                    |  |
| ** Bonferroni adjustment for multiple comparisons                                                                                           |    |               |                 |            |              |             |                    |                                      |            |              |                |                  |              |                    |  |
| Bold font indicates statistical significance (p value < 0.05)                                                                               |    |               |                 |            |              |             |                    |                                      |            |              |                |                  |              |                    |  |
