# Supplementary material
Source: PubMed Central journal article supplement (PMC5511091)
Supplement: NIHMS864056-supplement-11136_2017_1547_MOESM3_ESM.pdf [file NIHMS864056-supplement-11136_2017_1547_MOESM3_ESM.pdf]

| Supplemental table 3: Subgroup HADS Individual Item Scores for SST Participants in Whom CNV Developed in the Second Eye                     |    |               |                 |            |              |          |                    |                                      |            |              |                |                  |             |                    |  |
|---------------------------------------------------------------------------------------------------------------------------------------------|----|---------------|-----------------|------------|--------------|----------|--------------------|--------------------------------------|------------|--------------|----------------|------------------|-------------|--------------------|--|
| Before the last SST examination, Comparing Scores from (1) Baseline to prior to CNV diagnosis, and (2) Prior to and following CNV diagnosis |    |               |                 |            |              |          |                    |                                      |            |              |                |                  |             |                    |  |
| Subfoveal CNV subgroup (n=42)                                                                                                               |    |               |                 |            |              |          |                    |                                      |            |              |                |                  |             |                    |  |
| Comparison of mean and median HADS scores                                                                                                   |    |               |                 |            |              |          |                    |                                      |            |              |                |                  |             |                    |  |
| Baseline to prior to CNV diagnosis                                                                                                          |    |               |                 |            |              |          |                    | Prior to and following CNV diagnosis |            |              |                |                  |             |                    |  |
| HADS Item                                                                                                                                   | N  | Baseline Mean | Baseline Median | Prior Mean | Prior Median | p-value* | Adjusted p-value** | N                                    | Prior Mean | Prior Median | Following Mean | Following Median | p-value*    | Adjusted p-value** |  |
| hads_tense                                                                                                                                  | 34 | 3.26          | 3.00            | 3.41       | 3.50         | 0.26     | 1.00               | 32                                   | 3.34       | 3.00         | 3.50           | 4.00             | 0.23        | 1.00               |  |
| hads_enjoy                                                                                                                                  | 34 | 1.53          | 1.00            | 1.62       | 1.00         | 0.66     | 1.00               | 32                                   | 1.59       | 1.00         | 1.81           | 2.00             | 0.18        | 1.00               |  |
| hads_awful                                                                                                                                  | 34 | 3.59          | 4.00            | 3.59       | 4.00         | 1.00     | 1.00               | 32                                   | 3.56       | 4.00         | 3.56           | 4.00             | 1.00        | 1.00               |  |
| hads_laugh                                                                                                                                  | 34 | 1.32          | 1.00            | 1.44       | 1.00         | 0.46     | 1.00               | 32                                   | 1.38       | 1.00         | 1.28           | 1.00             | 0.56        | 1.00               |  |
| hads_worrying                                                                                                                               | 33 | 3.55          | 4.00            | 3.33       | 3.00         | 0.18     | 1.00               | 28                                   | 3.21       | 3.00         | 3.61           | 4.00             | <b>0.02</b> | 0.23               |  |
| hads_cheerful                                                                                                                               | 34 | 3.85          | 4.00            | 3.68       | 4.00         | 0.14     | 1.00               | 32                                   | 3.84       | 4.00         | 3.62           | 4.00             | 0.09        | 1.00               |  |
| hads_relaxed                                                                                                                                | 34 | 1.76          | 2.00            | 1.68       | 2.00         | 0.45     | 1.00               | 32                                   | 1.66       | 2.00         | 1.69           | 2.00             | 0.86        | 1.00               |  |
| hads_slowed_down                                                                                                                            | 34 | 2.79          | 3.00            | 2.85       | 3.00         | 0.71     | 1.00               | 32                                   | 2.84       | 3.00         | 2.78           | 3.00             | 0.72        | 1.00               |  |
| hads_butterflies                                                                                                                            | 34 | 1.44          | 1.00            | 1.35       | 1.00         | 0.48     | 1.00               | 32                                   | 1.38       | 1.00         | 1.25           | 1.00             | 0.25        | 1.00               |  |
| hads_appearance                                                                                                                             | 34 | 3.76          | 4.00            | 3.76       | 4.00         | 1.00     | 1.00               | 32                                   | 3.78       | 4.00         | 3.91           | 4.00             | 0.16        | 1.00               |  |
| hads_restless                                                                                                                               | 34 | 3.21          | 3.00            | 3.35       | 3.00         | 0.26     | 1.00               | 32                                   | 3.41       | 3.50         | 3.28           | 3.00             | 0.40        | 1.00               |  |
| hads_look_forward                                                                                                                           | 34 | 1.59          | 1.00            | 1.59       | 1.00         | 1.00     | 1.00               | 32                                   | 1.59       | 1.50         | 1.62           | 2.00             | 0.83        | 1.00               |  |
| hads_panic                                                                                                                                  | 34 | 3.62          | 4.00            | 3.65       | 4.00         | 0.79     | 1.00               | 32                                   | 3.59       | 4.00         | 3.62           | 4.00             | 0.81        | 1.00               |  |
| hads_book                                                                                                                                   | 34 | 1.12          | 1.00            | 1.29       | 1.00         | 0.18     | 1.00               | 32                                   | 1.25       | 1.00         | 1.59           | 1.00             | 0.07        | 0.98               |  |
| Probably subfoveal or juxtafoveal CNV subgroup (n=17)                                                                                       |    |               |                 |            |              |          |                    |                                      |            |              |                |                  |             |                    |  |
| Comparison of mean and median HADS scores                                                                                                   |    |               |                 |            |              |          |                    |                                      |            |              |                |                  |             |                    |  |
| Baseline to prior to CNV diagnosis                                                                                                          |    |               |                 |            |              |          |                    | Prior to and following CNV diagnosis |            |              |                |                  |             |                    |  |
| HADS Item                                                                                                                                   | N  | Baseline Mean | Baseline Median | Prior Mean | Prior Median | p-value* | Adjusted p-value** | N                                    | Prior Mean | Prior Median | Following Mean | Following Median | p-value*    | Adjusted p-value** |  |
| hads_tense                                                                                                                                  | 9  | 3.67          | 4.00            | 3.89       | 4.00         | 0.62     | 1.00               | 15                                   | 3.80       | 4.00         | 3.73           | 4.00             | 1.00        | 1.00               |  |
| hads_enjoy                                                                                                                                  | 9  | 1.11          | 1.00            | 1.56       | 1.00         | 0.50     | 1.00               | 15                                   | 1.47       | 1.00         | 1.67           | 1.00             | 0.63        | 1.00               |  |
| hads_awful                                                                                                                                  | 9  | 3.89          | 4.00            | 4.00       | 4.00         | 1.00     | 1.00               | 15                                   | 4.00       | 4.00         | 3.80           | 4.00             | 0.50        | 1.00               |  |
| hads_laugh                                                                                                                                  | 9  | 1.00          | 1.00            | 1.00       | 1.00         | NA       | NA                 | 15                                   | 1.00       | 1.00         | 1.33           | 1.00             | 0.25        | 1.00               |  |
| hads_worrying                                                                                                                               | 7  | 3.71          | 4.00            | 3.57       | 4.00         | 1.00     | 1.00               | 12                                   | 3.50       | 4.00         | 3.58           | 4.00             | 1.00        | 1.00               |  |
| hads_cheerful                                                                                                                               | 9  | 4.00          | 4.00            | 4.00       | 4.00         | NA       | NA                 | 15                                   | 3.87       | 4.00         | 3.80           | 4.00             | 1.00        | 1.00               |  |
| hads_relaxed                                                                                                                                | 9  | 1.56          | 2.00            | 1.11       | 1.00         | 0.12     | 1.00               | 15                                   | 1.13       | 1.00         | 1.33           | 1.00             | 0.53        | 1.00               |  |
| hads_slowed_down                                                                                                                            | 9  | 3.11          | 3.00            | 2.89       | 3.00         | 0.62     | 1.00               | 15                                   | 2.93       | 3.00         | 2.80           | 3.00             | 0.82        | 1.00               |  |
| hads_butterflies                                                                                                                            | 9  | 1.22          | 1.00            | 1.00       | 1.00         | 0.50     | 1.00               | 15                                   | 1.00       | 1.00         | 1.07           | 1.00             | 1.00        | 1.00               |  |
| hads_appearance                                                                                                                             | 9  | 3.67          | 4.00            | 4.00       | 4.00         | 0.50     | 1.00               | 15                                   | 4.00       | 4.00         | 3.80           | 4.00             | 0.25        | 1.00               |  |
| hads_restless                                                                                                                               | 9  | 3.56          | 4.00            | 3.78       | 4.00         | 0.50     | 1.00               | 15                                   | 3.73       | 4.00         | 3.27           | 3.00             | 0.09        | 1.00               |  |
| hads_look_forward                                                                                                                           | 9  | 1.00          | 1.00            | 1.11       | 1.00         | 1.00     | 1.00               | 15                                   | 1.13       | 1.00         | 1.33           | 1.00             | 0.38        | 1.00               |  |
| hads_panic                                                                                                                                  | 9  | 3.78          | 4.00            | 3.89       | 4.00         | 1.00     | 1.00               | 15                                   | 3.87       | 4.00         | 3.93           | 4.00             | 1.00        | 1.00               |  |
| hads_book                                                                                                                                   | 9  | 1.22          | 1.00            | 1.44       | 1.00         | 0.75     | 1.00               | 15                                   | 1.33       | 1.00         | 1.67           | 1.00             | 0.46        | 1.00               |  |

| Extrafoveal CNV subgroup (n=30)                               |    |               |                 |            |              |          |                    |                                      |            |              |                |                  |          |                    |
|---------------------------------------------------------------|----|---------------|-----------------|------------|--------------|----------|--------------------|--------------------------------------|------------|--------------|----------------|------------------|----------|--------------------|
| Comparison of mean and median HADS scores                     |    |               |                 |            |              |          |                    |                                      |            |              |                |                  |          |                    |
| Baseline to prior to CNV diagnosis                            |    |               |                 |            |              |          |                    |                                      |            |              |                |                  |          |                    |
| HADS Item                                                     | N  | Baseline Mean | Baseline Median | Prior Mean | Prior Median | p-value* | Adjusted p-value** | Prior to and following CNV diagnosis |            |              |                |                  |          |                    |
|                                                               |    |               |                 |            |              |          |                    | N                                    | Prior Mean | Prior Median | Following Mean | Following Median | p-value* | Adjusted p-value** |
| <b>hads_tense</b>                                             | 20 | 3.65          | 4.00            | 3.55       | 4.00         | 0.69     | 1.00               | 28                                   | 3.36       | 3.50         | 3.50           | 4.00             | 0.59     | 1.00               |
| <b>hads_enjoy</b>                                             | 20 | 1.5           | 1.00            | 1.65       | 1.00         | 0.69     | 1.00               | 28                                   | 1.64       | 1.00         | 1.86           | 2.00             | 0.15     | 1.00               |
| <b>hads_awful</b>                                             | 20 | 3.45          | 4.00            | 3.80       | 4.00         | 0.09     | 1.00               | 28                                   | 3.64       | 4.00         | 3.75           | 4.00             | 0.50     | 1.00               |
| <b>hads_laugh</b>                                             | 20 | 1.50          | 1.00            | 1.30       | 1.00         | 0.47     | 1.00               | 28                                   | 1.57       | 1.00         | 1.32           | 1.00             | 0.27     | 1.00               |
| <b>hads_worrying</b>                                          | 19 | 3.37          | 3.00            | 3.42       | 3.00         | 1.00     | 1.00               | 24                                   | 3.33       | 3.00         | 3.54           | 4.00             | 0.46     | 1.00               |
| <b>hads_cheerful</b>                                          | 20 | 3.75          | 4.00            | 3.65       | 4.00         | 0.69     | 1.00               | 28                                   | 3.75       | 4.00         | 3.75           | 4.00             | 1.00     | 1.00               |
| <b>hads_relaxed</b>                                           | 20 | 1.60          | 1.50            | 1.65       | 2.00         | 1.00     | 1.00               | 28                                   | 1.64       | 2.00         | 1.79           | 2.00             | 0.53     | 1.00               |
| <b>hads_slowed_down</b>                                       | 20 | 3.10          | 3.00            | 3.00       | 3.00         | 0.75     | 1.00               | 28                                   | 3.00       | 3.00         | 2.93           | 3.00             | 0.85     | 1.00               |
| <b>hads_butterflies</b>                                       | 20 | 1.50          | 1.00            | 1.40       | 1.00         | 0.75     | 1.00               | 28                                   | 1.46       | 1.00         | 1.46           | 1.00             | 1.00     | 1.00               |
| <b>hads_appearance</b>                                        | 20 | 4.00          | 4.00            | 3.95       | 4.00         | 1.00     | 1.00               | 28                                   | 3.86       | 4.00         | 3.96           | 4.00             | 0.50     | 1.00               |
| <b>hads_restless</b>                                          | 20 | 3.45          | 3.50            | 3.25       | 3.00         | 0.56     | 1.00               | 28                                   | 3.21       | 3.00         | 3.32           | 3.00             | 0.69     | 1.00               |
| <b>hads_look_forward</b>                                      | 20 | 1.40          | 1.00            | 1.55       | 1.00         | 0.45     | 1.00               | 28                                   | 1.61       | 1.00         | 1.36           | 1.00             | 0.25     | 1.00               |
| <b>hads_panic</b>                                             | 20 | 3.60          | 4.00            | 3.70       | 4.00         | 0.75     | 1.00               | 28                                   | 3.64       | 4.00         | 3.50           | 4.00             | 0.43     | 1.00               |
| <b>hads_book</b>                                              | 20 | 1.15          | 1.00            | 1.40       | 1.00         | 0.31     | 1.00               | 28                                   | 1.71       | 1.00         | 1.71           | 1.00             | 1.00     | 1.00               |
| * Paired t-test (n ≥30) or Wilcoxon signed-rank test (n <30)  |    |               |                 |            |              |          |                    |                                      |            |              |                |                  |          |                    |
| ** Bonferroni adjustment for multiple comparisons             |    |               |                 |            |              |          |                    |                                      |            |              |                |                  |          |                    |
| Bold font indicates statistical significance (p value < 0.05) |    |               |                 |            |              |          |                    |                                      |            |              |                |                  |          |                    |
