# Supplementary material
Source: PubMed Central journal article supplement (PMC5511091)
Supplement: NIHMS864056-supplement-11136_2017_1547_MOESM4_ESM.pdf [file NIHMS864056-supplement-11136_2017_1547_MOESM4_ESM.pdf]

| Supplemental table 4: SF-36 Individual Item Scores and Physical and Mental Component Summary Scores for SST Participants in Whom CNV Developed in the Second Eye Before the last SST examination, Comparing Scores from (1) Baseline to prior to CNV diagnosis, and (2) Prior to and following CNV diagnosis |    |               |                 |            |              |              |                   |                                      |            |              |                |                  |              |                   |
|--------------------------------------------------------------------------------------------------------------------------------------------------------------------------------------------------------------------------------------------------------------------------------------------------------------|----|---------------|-----------------|------------|--------------|--------------|-------------------|--------------------------------------|------------|--------------|----------------|------------------|--------------|-------------------|
| Comparison of mean and median SF-36 scores                                                                                                                                                                                                                                                                   |    |               |                 |            |              |              |                   |                                      |            |              |                |                  |              |                   |
| Baseline to prior to CNV diagnosis                                                                                                                                                                                                                                                                           |    |               |                 |            |              |              |                   | Prior to and following CNV diagnosis |            |              |                |                  |              |                   |
| SF-36 Item                                                                                                                                                                                                                                                                                                   | N  | Baseline Mean | Baseline Median | Prior Mean | Prior Median | p-value*     | Adjusted p-value† | N                                    | Prior Mean | Prior Median | Following Mean | Following Median | p-value*     | Adjusted p-value† |
| <b>sf_health</b>                                                                                                                                                                                                                                                                                             | 66 | 2.42          | 2.00            | 2.76       | 3.00         | <b>0.008</b> | 0.27              | 77                                   | 2.69       | 3.00         | 2.71           | 3.00             | 0.82         | 1.00              |
| <b>sf_health_year_ago</b>                                                                                                                                                                                                                                                                                    | 66 | 3.05          | 3.00            | 2.89       | 3.00         | 0.12         | 1.00              | 77                                   | 2.95       | 3.00         | 3.08           | 3.00             | 0.13         | 1.00              |
| <b>sf_vigorous</b>                                                                                                                                                                                                                                                                                           | 57 | 1.88          | 2.00            | 1.75       | 2.00         | 0.29         | 1.00              | 74                                   | 1.74       | 2.00         | 1.73           | 2.00             | 0.88         | 1.00              |
| <b>sf_moderate</b>                                                                                                                                                                                                                                                                                           | 63 | 2.44          | 3.00            | 2.17       | 2.00         | <b>0.01</b>  | 0.43              | 76                                   | 2.21       | 2.00         | 2.25           | 2.00             | 0.71         | 1.00              |
| <b>sf_lifting</b>                                                                                                                                                                                                                                                                                            | 66 | 2.59          | 3.00            | 2.44       | 3.00         | 0.10         | 1.00              | 77                                   | 2.49       | 3.00         | 2.30           | 2.00             | <b>0.02</b>  | 0.65              |
| <b>sf_several_stairs</b>                                                                                                                                                                                                                                                                                     | 66 | 2.21          | 2.00            | 2.02       | 2.00         | <b>0.04</b>  | 1.00              | 76                                   | 2.00       | 2.00         | 1.88           | 2.00             | 0.17         | 1.00              |
| <b>sf_stairs</b>                                                                                                                                                                                                                                                                                             | 66 | 2.58          | 3.00            | 2.50       | 3.00         | 0.43         | 1.00              | 76                                   | 2.50       | 3.00         | 2.45           | 3.00             | 0.55         | 1.00              |
| <b>sf_stooping</b>                                                                                                                                                                                                                                                                                           | 66 | 2.30          | 2.00            | 2.20       | 2.00         | 0.18         | 1.00              | 76                                   | 2.22       | 2.00         | 2.22           | 2.00             | 1.00         | 1.00              |
| <b>sf_walk_mile</b>                                                                                                                                                                                                                                                                                          | 62 | 2.15          | 2.00            | 1.90       | 2.00         | <b>0.02</b>  | 0.75              | 76                                   | 1.97       | 2.00         | 1.84           | 2.00             | 0.11         | 1.00              |
| <b>sf_walk_sev_blocks</b>                                                                                                                                                                                                                                                                                    | 66 | 2.41          | 3.00            | 2.27       | 2.00         | 0.11         | 1.00              | 76                                   | 2.36       | 3.00         | 2.28           | 2.00             | 0.39         | 1.00              |
| <b>sf_walk_one_block</b>                                                                                                                                                                                                                                                                                     | 66 | 2.73          | 3.00            | 2.62       | 3.00         | 0.16         | 1.00              | 76                                   | 2.68       | 3.00         | 2.59           | 3.00             | 0.16         | 1.00              |
| <b>sf_dressing</b>                                                                                                                                                                                                                                                                                           | 66 | 2.92          | 3.00            | 2.80       | 3.00         | <b>0.03</b>  | 1.00              | 77                                   | 2.74       | 3.00         | 2.81           | 3.00             | 0.23         | 1.00              |
| <b>sf_cut_down</b>                                                                                                                                                                                                                                                                                           | 66 | 1.86          | 2.00            | 1.74       | 2.00         | <b>0.04</b>  | 1.00              | 77                                   | 1.78       | 2.00         | 1.79           | 2.00             | 0.82         | 1.00              |
| <b>sf_accomplished_less</b>                                                                                                                                                                                                                                                                                  | 66 | 1.70          | 2.00            | 1.67       | 2.00         | 0.67         | 1.00              | 77                                   | 1.69       | 2.00         | 1.60           | 2.00             | 0.15         | 1.00              |
| <b>sf_limited_kind</b>                                                                                                                                                                                                                                                                                       | 66 | 1.76          | 2.00            | 1.65       | 2.00         | 0.11         | 1.00              | 77                                   | 1.70       | 2.00         | 1.64           | 2.00             | 0.32         | 1.00              |
| <b>sf_work</b>                                                                                                                                                                                                                                                                                               | 66 | 1.67          | 2.00            | 1.67       | 2.00         | 1.00         | 1.00              | 77                                   | 1.69       | 2.00         | 1.60           | 2.00             | 0.18         | 1.00              |
| <b>sf_emo_work</b>                                                                                                                                                                                                                                                                                           | 66 | 1.89          | 2.00            | 1.88       | 2.00         | 0.74         | 1.00              | 76                                   | 1.92       | 2.00         | 1.83           | 2.00             | <b>0.007</b> | 0.26              |
| <b>sf_emo_accomplished</b>                                                                                                                                                                                                                                                                                   | 66 | 1.86          | 2.00            | 1.88       | 2.00         | 0.71         | 1.00              | 77                                   | 1.92       | 2.00         | 1.82           | 2.00             | <b>0.01</b>  | 0.38              |
| <b>sf_emo_careful</b>                                                                                                                                                                                                                                                                                        | 66 | 1.94          | 2.00            | 1.92       | 2.00         | 0.71         | 1.00              | 77                                   | 1.95       | 2.00         | 1.83           | 2.00             | <b>0.002</b> | 0.08              |
| <b>sf_emo_social</b>                                                                                                                                                                                                                                                                                         | 66 | 1.39          | 1.00            | 1.48       | 1.00         | 0.39         | 1.00              | 77                                   | 1.43       | 1.00         | 1.77           | 1.00             | <b>0.002</b> | 0.08              |
| <b>sf_bodily_pain</b>                                                                                                                                                                                                                                                                                        | 66 | 2.23          | 2.00            | 2.47       | 2.00         | 0.17         | 1.00              | 77                                   | 2.39       | 2.00         | 2.22           | 2.00             | 0.26         | 1.00              |
| <b>sf_pain_work</b>                                                                                                                                                                                                                                                                                          | 66 | 1.50          | 1.00            | 1.74       | 1.00         | 0.08         | 1.00              | 77                                   | 1.61       | 1.00         | 1.60           | 1.00             | 0.91         | 1.00              |
| <b>sf_full_of_pep</b>                                                                                                                                                                                                                                                                                        | 66 | 3.11          | 3.00            | 3.15       | 3.00         | 0.81         | 1.00              | 77                                   | 2.96       | 2.00         | 3.55           | 4.00             | <b>0.005</b> | 0.18              |
| <b>sf_very_nervous</b>                                                                                                                                                                                                                                                                                       | 65 | 5.20          | 5.00            | 5.37       | 6.00         | 0.17         | 1.00              | 76                                   | 5.34       | 6.00         | 5.28           | 6.00             | 0.60         | 1.00              |
| <b>sf_down_dumps</b>                                                                                                                                                                                                                                                                                         | 66 | 5.70          | 6.00            | 5.58       | 6.00         | 0.23         | 1.00              | 77                                   | 5.68       | 6.00         | 5.48           | 6.00             | <b>0.04</b>  | 1.00              |
| <b>sf_calm_peaceful</b>                                                                                                                                                                                                                                                                                      | 65 | 2.43          | 2.00            | 2.51       | 2.00         | 0.69         | 1.00              | 76                                   | 2.39       | 2.00         | 2.46           | 2.00             | 0.69         | 1.00              |
| <b>sf_lot_of_energy</b>                                                                                                                                                                                                                                                                                      | 66 | 2.89          | 2.00            | 3.17       | 3.50         | 0.09         | 1.00              | 77                                   | 3.04       | 3.00         | 3.40           | 3.00             | <b>0.01</b>  | 0.53              |
| <b>sf_downhearted</b>                                                                                                                                                                                                                                                                                        | 66 | 5.38          | 6.00            | 5.39       | 6.00         | 0.91         | 1.00              | 77                                   | 5.52       | 6.00         | 5.38           | 6.00             | 0.14         | 1.00              |
| <b>sf_worn_out</b>                                                                                                                                                                                                                                                                                           | 66 | 4.89          | 5.00            | 4.65       | 5.00         | 0.11         | 1.00              | 77                                   | 4.68       | 5.00         | 4.40           | 5.00             | 0.06         | 1.00              |
| <b>sf_happy_person</b>                                                                                                                                                                                                                                                                                       | 66 | 2.18          | 2.00            | 2.27       | 2.00         | 0.52         | 1.00              | 77                                   | 2.18       | 2.00         | 2.27           | 2.00             | 0.47         | 1.00              |
| <b>sf_feel_tired</b>                                                                                                                                                                                                                                                                                         | 66 | 4.59          | 5.00            | 4.29       | 4.00         | <b>0.04</b>  | 1.00              | 77                                   | 4.19       | 4.00         | 4.19           | 4.00             | 1.00         | 1.00              |
| <b>sf_emo_visiting</b>                                                                                                                                                                                                                                                                                       | 66 | 4.42          | 5.00            | 4.41       | 5.00         | 0.91         | 1.00              | 76                                   | 4.49       | 5.00         | 4.21           | 4.50             | <b>0.03</b>  | 1.00              |
| <b>sf_sick_easier</b>                                                                                                                                                                                                                                                                                        | 66 | 4.42          | 5.00            | 4.50       | 5.00         | 0.55         | 1.00              | 77                                   | 4.44       | 5.00         | 4.36           | 5.00             | 0.56         | 1.00              |
| <b>sf_healthy_as_any</b>                                                                                                                                                                                                                                                                                     | 66 | 2.18          | 2.00            | 2.26       | 2.00         | 0.69         | 1.00              | 77                                   | 2.14       | 2.00         | 2.40           | 2.00             | 0.10         | 1.00              |
| <b>sf_expect_worse</b>                                                                                                                                                                                                                                                                                       | 66 | 3.98          | 4.00            | 3.56       | 3.50         | <b>0.03</b>  | 0.99              | 77                                   | 3.69       | 4.00         | 3.57           | 4.00             | 0.50         | 1.00              |
| <b>sf_health_excel</b>                                                                                                                                                                                                                                                                                       | 66 | 2.39          | 2.00            | 2.59       | 2.00         | 0.25         | 1.00              | 77                                   | 2.31       | 2.00         | 2.57           | 2.00             | 0.07         | 1.00              |
|                                                                                                                                                                                                                                                                                                              |    |               |                 |            |              |              |                   |                                      |            |              |                |                  |              |                   |
| SF-36 Summary Score                                                                                                                                                                                                                                                                                          | N  | Baseline Mean | Baseline Median | Prior Mean | Prior Median | p-value*     | Adjusted p-value† | N                                    | Prior Mean | Prior Median | Following Mean | Following Median | p-value*     | Adjusted p-value† |
| <b>Physical Component Summary</b>                                                                                                                                                                                                                                                                            | 66 | 65.3          | 73.6            | 56.7       | 63.4         | 0.006        | 0.01              | 75                                   | 58.7       | 62.3         | 58.7           | 64.5             | 1.00         | 1.00              |
| <b>Mental Component Summary</b>                                                                                                                                                                                                                                                                              | 66 | 84.4          | 90.2            | 85.8       | 90.4         | 0.53         | 1.00              | 75                                   | 88.6       | 91.1         | 80.4           | 85.9             | 0.0003       | 0.0006            |
| * Paired t test                                                                                                                                                                                                                                                                                              |    |               |                 |            |              |              |                   |                                      |            |              |                |                  |              |                   |
| † Bonferroni adjustment for multiple comparisons                                                                                                                                                                                                                                                             |    |               |                 |            |              |              |                   |                                      |            |              |                |                  |              |                   |
| <b>Bold font indicates statistical significance (p value &lt; 0.05)</b>                                                                                                                                                                                                                                      |    |               |                 |            |              |              |                   |                                      |            |              |                |                  |              |                   |
