# Supplementary material
Source: PubMed Central journal article supplement (PMC5511091)
Supplement: NIHMS864056-supplement-11136_2017_1547_MOESM5_ESM.pdf [file NIHMS864056-supplement-11136_2017_1547_MOESM5_ESM.pdf]

| Supplemental table 5: Subgroup SF-36 Individual Item Scores and Physical and Mental Component Summary Scores for SST Participants in Whom CNV Developed in the Second Eye Before the last SST examination, Comparing Scores from (1) Baseline to prior to CNV diagnosis, and (2) Prior to and following CNV diagnosis |    |               |                 |            |              |          |                   |                                      |            |              |                |                  |          |                   |
|-----------------------------------------------------------------------------------------------------------------------------------------------------------------------------------------------------------------------------------------------------------------------------------------------------------------------|----|---------------|-----------------|------------|--------------|----------|-------------------|--------------------------------------|------------|--------------|----------------|------------------|----------|-------------------|
| Subfoveal CNV subgroup (n=42)                                                                                                                                                                                                                                                                                         |    |               |                 |            |              |          |                   |                                      |            |              |                |                  |          |                   |
| Comparison of mean and median SF-36 scores                                                                                                                                                                                                                                                                            |    |               |                 |            |              |          |                   |                                      |            |              |                |                  |          |                   |
| Baseline to prior to CNV diagnosis                                                                                                                                                                                                                                                                                    |    |               |                 |            |              |          |                   | Prior to and following CNV diagnosis |            |              |                |                  |          |                   |
| SF-36 Item                                                                                                                                                                                                                                                                                                            | N  | Baseline Mean | Baseline Median | Prior Mean | Prior Median | p-value* | Adjusted p-value† | N                                    | Prior Mean | Prior Median | Following Mean | Following Median | p-value* | Adjusted p-value† |
| sf_health                                                                                                                                                                                                                                                                                                             | 34 | 2.56          | 2.50            | 2.88       | 3.00         | 0.06     | 1.00              | 32                                   | 2.88       | 3.00         | 2.91           | 3.00             | 0.85     | 1.00              |
| sf_health_year_ago                                                                                                                                                                                                                                                                                                    | 34 | 3.09          | 3.00            | 2.79       | 3.00         | 0.05     | 1.00              | 32                                   | 2.91       | 3.00         | 2.91           | 3.00             | 1.00     | 1.00              |
| sf_vigorous                                                                                                                                                                                                                                                                                                           | 26 | 1.96          | 2.00            | 1.69       | 2.00         | 0.09     | 1.00              | 29                                   | 1.66       | 2.00         | 1.69           | 2.00             | 1.00     | 1.00              |
| sf_moderate                                                                                                                                                                                                                                                                                                           | 31 | 2.45          | 3.00            | 2.16       | 2.00         | 0.08     | 1.00              | 31                                   | 2.16       | 2.00         | 2.06           | 2.00             | 0.54     | 1.00              |
| sf_lifting                                                                                                                                                                                                                                                                                                            | 34 | 2.50          | 3.00            | 2.35       | 3.00         | 0.34     | 1.00              | 32                                   | 2.47       | 3.00         | 2.12           | 2.00             | 0.03     | 1.00              |
| sf_several_stairs                                                                                                                                                                                                                                                                                                     | 34 | 2.18          | 2.00            | 2.09       | 2.00         | 0.45     | 1.00              | 31                                   | 2.03       | 2.00         | 1.84           | 2.00             | 0.08     | 1.00              |
| sf_stairs                                                                                                                                                                                                                                                                                                             | 34 | 2.59          | 3.00            | 2.47       | 3.00         | 0.29     | 1.00              | 31                                   | 2.45       | 3.00         | 2.39           | 2.00             | 0.64     | 1.00              |
| sf_stooping                                                                                                                                                                                                                                                                                                           | 34 | 2.38          | 2.00            | 2.21       | 2.00         | 0.14     | 1.00              | 31                                   | 2.19       | 2.00         | 2.23           | 2.00             | 0.81     | 1.00              |
| sf_walk_mile                                                                                                                                                                                                                                                                                                          | 33 | 2.12          | 2.00            | 1.85       | 2.00         | 0.06     | 1.00              | 31                                   | 1.94       | 2.00         | 1.87           | 2.00             | 0.57     | 1.00              |
| sf_walk_sev_blocks                                                                                                                                                                                                                                                                                                    | 34 | 2.35          | 3.00            | 2.24       | 2.00         | 0.35     | 1.00              | 31                                   | 2.32       | 3.00         | 2.19           | 2.00             | 0.33     | 1.00              |
| sf_walk_one_block                                                                                                                                                                                                                                                                                                     | 34 | 2.71          | 3.00            | 2.59       | 3.00         | 0.29     | 1.00              | 31                                   | 2.68       | 3.00         | 2.61           | 3.00             | 0.54     | 1.00              |
| sf_dressing                                                                                                                                                                                                                                                                                                           | 34 | 2.91          | 3.00            | 2.82       | 3.00         | 0.18     | 1.00              | 32                                   | 2.72       | 3.00         | 2.78           | 3.00             | 0.49     | 1.00              |
| sf_cut_down                                                                                                                                                                                                                                                                                                           | 34 | 1.85          | 2.00            | 1.74       | 2.00         | 0.16     | 1.00              | 32                                   | 1.81       | 2.00         | 1.78           | 2.00             | 0.71     | 1.00              |
| sf_accomplished_less                                                                                                                                                                                                                                                                                                  | 34 | 1.71          | 2.00            | 1.68       | 2.00         | 0.77     | 1.00              | 32                                   | 1.69       | 2.00         | 1.53           | 2.00             | 0.10     | 1.00              |
| sf_limited_kind                                                                                                                                                                                                                                                                                                       | 34 | 1.76          | 2.00            | 1.68       | 2.00         | 0.32     | 1.00              | 32                                   | 1.66       | 2.00         | 1.56           | 2.00             | 0.37     | 1.00              |
| sf_work                                                                                                                                                                                                                                                                                                               | 34 | 1.65          | 2.00            | 1.71       | 2.00         | 0.42     | 1.00              | 32                                   | 1.72       | 2.00         | 1.53           | 2.00             | 0.06     | 1.00              |
| sf_emo_work                                                                                                                                                                                                                                                                                                           | 34 | 1.85          | 2.00            | 1.82       | 2.00         | 0.66     | 1.00              | 32                                   | 1.88       | 2.00         | 1.78           | 2.00             | 0.08     | 1.00              |
| sf_emo_accomplished                                                                                                                                                                                                                                                                                                   | 34 | 1.85          | 2.00            | 1.82       | 2.00         | 0.57     | 1.00              | 32                                   | 1.84       | 2.00         | 1.78           | 2.00             | 0.33     | 1.00              |
| sf_emo_careful                                                                                                                                                                                                                                                                                                        | 34 | 1.91          | 2.00            | 1.88       | 2.00         | 0.66     | 1.00              | 32                                   | 1.91       | 2.00         | 1.78           | 2.00             | 0.04     | 1.00              |
| sf_emo_social                                                                                                                                                                                                                                                                                                         | 34 | 1.56          | 1.00            | 1.41       | 1.00         | 0.28     | 1.00              | 32                                   | 1.50       | 1.00         | 1.72           | 1.00             | 0.23     | 1.00              |
| sf_bodily_pain                                                                                                                                                                                                                                                                                                        | 34 | 2.29          | 2.00            | 2.38       | 2.00         | 0.71     | 1.00              | 32                                   | 2.41       | 2.00         | 2.25           | 2.00             | 0.48     | 1.00              |
| sf_pain_work                                                                                                                                                                                                                                                                                                          | 34 | 1.62          | 1.00            | 1.76       | 1.00         | 0.48     | 1.00              | 32                                   | 1.66       | 1.00         | 1.50           | 1.00             | 0.43     | 1.00              |
| sf_full_of_pep                                                                                                                                                                                                                                                                                                        | 34 | 3.26          | 3.00            | 3.50       | 4.00         | 0.41     | 1.00              | 32                                   | 3.34       | 3.00         | 3.88           | 4.00             | 0.10     | 1.00              |
| sf_very_nervous                                                                                                                                                                                                                                                                                                       | 34 | 5.12          | 5.00            | 5.21       | 5.50         | 0.60     | 1.00              | 32                                   | 5.22       | 6.00         | 5.31           | 6.00             | 0.60     | 1.00              |
| sf_down_dumps                                                                                                                                                                                                                                                                                                         | 34 | 5.65          | 6.00            | 5.47       | 6.00         | 0.31     | 1.00              | 32                                   | 5.59       | 6.00         | 5.47           | 6.00             | 0.44     | 1.00              |
| sf_calm_peaceful                                                                                                                                                                                                                                                                                                      | 34 | 2.35          | 2.00            | 2.62       | 2.00         | 0.33     | 1.00              | 32                                   | 2.59       | 2.00         | 2.62           | 2.00             | 0.91     | 1.00              |
| sf_lot_of_energy                                                                                                                                                                                                                                                                                                      | 34 | 3.03          | 3.00            | 3.53       | 4.00         | 0.03     | 1.00              | 32                                   | 3.31       | 3.00         | 3.53           | 3.50             | 0.35     | 1.00              |
| sf_downhearted                                                                                                                                                                                                                                                                                                        | 34 | 5.24          | 5.00            | 5.38       | 6.00         | 0.46     | 1.00              | 32                                   | 5.50       | 6.00         | 5.31           | 6.00             | 0.23     | 1.00              |
| sf_worn_out                                                                                                                                                                                                                                                                                                           | 34 | 4.76          | 5.00            | 4.35       | 4.50         | 0.13     | 1.00              | 32                                   | 4.50       | 4.50         | 4.22           | 4.00             | 0.25     | 1.00              |
| sf_happy_person                                                                                                                                                                                                                                                                                                       | 34 | 2.32          | 2.00            | 2.44       | 2.00         | 0.59     | 1.00              | 32                                   | 2.41       | 2.00         | 2.31           | 2.00             | 0.69     | 1.00              |
| sf_feel_tired                                                                                                                                                                                                                                                                                                         | 34 | 4.38          | 4.00            | 4.21       | 4.00         | 0.46     | 1.00              | 32                                   | 4.16       | 4.00         | 3.91           | 4.00             | 0.30     | 1.00              |
| sf_emo_visiting                                                                                                                                                                                                                                                                                                       | 34 | 4.44          | 5.00            | 4.50       | 5.00         | 0.74     | 1.00              | 31                                   | 4.58       | 5.00         | 4.16           | 4.00             | 0.06     | 1.00              |
| sf_sick_easier                                                                                                                                                                                                                                                                                                        | 34 | 4.50          | 5.00            | 4.59       | 5.00         | 0.57     | 1.00              | 32                                   | 4.59       | 5.00         | 4.44           | 5.00             | 0.48     | 1.00              |
| sf_healthy_as_any                                                                                                                                                                                                                                                                                                     | 34 | 2.15          | 2.00            | 2.56       | 2.00         | 0.17     | 1.00              | 32                                   | 2.28       | 2.00         | 2.50           | 2.00             | 0.41     | 1.00              |
| sf_expect_worse                                                                                                                                                                                                                                                                                                       | 34 | 3.97          | 4.00            | 3.47       | 3.00         | 0.06     | 1.00              | 32                                   | 3.62       | 4.00         | 3.53           | 4.00             | 0.74     | 1.00              |
| sf_health_excel                                                                                                                                                                                                                                                                                                       | 34 | 2.50          | 2.00            | 2.74       | 2.00         | 0.36     | 1.00              | 32                                   | 2.44       | 2.00         | 2.59           | 2.00             | 0.51     | 1.00              |
|                                                                                                                                                                                                                                                                                                                       |    |               |                 |            |              |          |                   |                                      |            |              |                |                  |          |                   |
| SF-36 Summary Score                                                                                                                                                                                                                                                                                                   | N  | Baseline Mean | Baseline Median | Prior Mean | Prior Median | p-value* | Adjusted p-value† | N                                    | Prior Mean | Prior Median | Following Mean | Following Median | p-value* | Adjusted p-value† |
| Physical Component Summary                                                                                                                                                                                                                                                                                            | 34 | 65.1          | 73.5            | 57.7       | 65.7         | 0.11     | 0.22              | 30                                   | 58.8       | 69.2         | 57.6           | 72.4             | 0.79     | 1.00              |
| Mental Component Summary                                                                                                                                                                                                                                                                                              | 34 | 81.6          | 89.5            | 81.8       | 87.7         | 0.97     | 1.00              | 30                                   | 85.1       | 87.9         | 78.3           | 82.8             | 0.07     | 0.14              |

| Probably Subfoveal or juxtafoveal CNV subgroup (n=17) |   |               |                 |            |              |          |                   |                                      |            |              |                |                  |          |                   |
|-------------------------------------------------------|---|---------------|-----------------|------------|--------------|----------|-------------------|--------------------------------------|------------|--------------|----------------|------------------|----------|-------------------|
| Comparison of mean and median SF-36 scores            |   |               |                 |            |              |          |                   |                                      |            |              |                |                  |          |                   |
| Baseline to prior to CNV diagnosis                    |   |               |                 |            |              |          |                   | Prior to and following CNV diagnosis |            |              |                |                  |          |                   |
| SF-36 Item                                            | N | Baseline Mean | Baseline Median | Prior Mean | Prior Median | p-value* | Adjusted p-value† | N                                    | Prior Mean | Prior Median | Following Mean | Following Median | p-value* | Adjusted p-value† |
| sf_health                                             | 9 | 1.78          | 2.00            | 2.33       | 2.00         | 0.25     | 1.00              | 15                                   | 2.40       | 3.00         | 2.27           | 2.00             | 0.75     | 1.00              |
| sf_health_year_ago                                    | 9 | 3.00          | 3.00            | 2.78       | 3.00         | 1.00     | 1.00              | 15                                   | 2.67       | 3.00         | 3.20           | 3.00             | 0.12     | 1.00              |
| sf_vigorous                                           | 8 | 2.00          | 2.00            | 1.88       | 2.00         | 1.00     | 1.00              | 15                                   | 1.80       | 2.00         | 1.67           | 1.00             | 0.77     | 1.00              |
| sf_moderate                                           | 9 | 2.89          | 3.00            | 2.44       | 2.00         | 0.22     | 1.00              | 15                                   | 2.53       | 3.00         | 2.33           | 2.00             | 0.59     | 1.00              |
| sf_lifting                                            | 9 | 2.78          | 3.00            | 2.78       | 3.00         | 1.00     | 1.00              | 15                                   | 2.80       | 3.00         | 2.47           | 2.00             | 0.06     | 1.00              |
| sf_several_stairs                                     | 9 | 2.44          | 3.00            | 2.11       | 2.00         | 0.38     | 1.00              | 15                                   | 2.13       | 2.00         | 1.80           | 2.00             | 0.23     | 1.00              |
| sf_stairs                                             | 9 | 2.67          | 3.00            | 2.78       | 3.00         | 1.00     | 1.00              | 15                                   | 2.67       | 3.00         | 2.60           | 3.00             | 1.00     | 1.00              |
| sf_stooping                                           | 9 | 2.11          | 2.00            | 2.22       | 2.00         | 1.00     | 1.00              | 15                                   | 2.47       | 2.00         | 2.27           | 2.00             | 0.56     | 1.00              |
| sf_walk_mile                                          | 8 | 2.12          | 2.00            | 2.25       | 2.00         | 1.00     | 1.00              | 15                                   | 2.27       | 2.00         | 1.60           | 2.00             | 0.01     | 0.39              |
| sf_walk_sev_blocks                                    | 9 | 2.67          | 3.00            | 2.67       | 3.00         | 1.00     | 1.00              | 15                                   | 2.73       | 3.00         | 2.47           | 3.00             | 0.36     | 1.00              |
| sf_walk_one_block                                     | 9 | 2.89          | 3.00            | 2.89       | 3.00         | 1.00     | 1.00              | 15                                   | 2.93       | 3.00         | 2.67           | 3.00             | 0.12     | 1.00              |
| sf_dressing                                           | 9 | 2.89          | 3.00            | 2.78       | 3.00         | 1.00     | 1.00              | 15                                   | 2.87       | 3.00         | 2.93           | 3.00             | 1.00     | 1.00              |
| sf_cut_down                                           | 9 | 2.00          | 2.00            | 1.89       | 2.00         | 1.00     | 1.00              | 15                                   | 1.93       | 2.00         | 1.87           | 2.00             | 1.00     | 1.00              |
| sf_accomplished_less                                  | 9 | 1.67          | 2.00            | 1.78       | 2.00         | 1.00     | 1.00              | 15                                   | 1.87       | 2.00         | 1.80           | 2.00             | 1.00     | 1.00              |
| sf_limited_kind                                       | 9 | 1.78          | 2.00            | 1.56       | 2.00         | 0.50     | 1.00              | 15                                   | 1.80       | 2.00         | 1.67           | 2.00             | 0.69     | 1.00              |
| sf_work                                               | 9 | 1.78          | 2.00            | 1.67       | 2.00         | 1.00     | 1.00              | 15                                   | 1.80       | 2.00         | 1.73           | 2.00             | 1.00     | 1.00              |
| sf_emo_work                                           | 9 | 2.00          | 2.00            | 2.00       | 2.00         | NA       | NA                | 14                                   | 2.00       | 2.00         | 1.93           | 2.00             | 1.00     | 1.00              |
| sf_emo_accomplished                                   | 9 | 1.89          | 2.00            | 2.00       | 2.00         | 1.00     | 1.00              | 15                                   | 2.00       | 2.00         | 1.93           | 2.00             | 1.00     | 1.00              |
| sf_emo_careful                                        | 9 | 2.00          | 2.00            | 2.00       | 2.00         | NA       | NA                | 15                                   | 2.00       | 2.00         | 1.93           | 2.00             | 1.00     | 1.00              |
| sf_emo_social                                         | 9 | 1.00          | 1.00            | 1.22       | 1.00         | 0.50     | 1.00              | 15                                   | 1.13       | 1.00         | 1.67           | 1.00             | 0.05     | 1.00              |
| sf_bodily_pain                                        | 9 | 2.00          | 1.00            | 1.89       | 1.00         | 1.00     | 1.00              | 15                                   | 1.80       | 1.00         | 2.13           | 2.00             | 0.47     | 1.00              |
| sf_pain_work                                          | 9 | 1.22          | 1.00            | 1.22       | 1.00         | 1.00     | 1.00              | 15                                   | 1.13       | 1.00         | 1.47           | 1.00             | 0.19     | 1.00              |
| sf_full_of_pep                                        | 9 | 2.11          | 2.00            | 2.44       | 2.00         | 0.38     | 1.00              | 15                                   | 2.67       | 2.00         | 3.33           | 3.00             | 0.19     | 1.00              |
| sf_very_nervous                                       | 9 | 5.67          | 6.00            | 5.78       | 6.00         | 1.00     | 1.00              | 15                                   | 5.47       | 6.00         | 5.40           | 6.00             | 0.82     | 1.00              |
| sf_down_dumps                                         | 9 | 6.00          | 6.00            | 5.78       | 6.00         | 0.50     | 1.00              | 15                                   | 5.93       | 6.00         | 5.67           | 6.00             | 0.25     | 1.00              |
| sf_calm_peaceful                                      | 9 | 2.11          | 2.00            | 1.67       | 2.00         | 1.00     | 1.00              | 15                                   | 1.67       | 2.00         | 1.93           | 2.00             | 0.50     | 1.00              |
| sf_lot_of_energy                                      | 9 | 2.00          | 2.00            | 2.22       | 2.00         | 0.78     | 1.00              | 15                                   | 2.47       | 2.00         | 3.07           | 3.00             | 0.21     | 1.00              |
| sf_downhearted                                        | 9 | 5.89          | 6.00            | 5.78       | 6.00         | 1.00     | 1.00              | 15                                   | 5.87       | 6.00         | 5.80           | 6.00             | 1.00     | 1.00              |
| sf_worn_out                                           | 9 | 5.33          | 6.00            | 5.56       | 6.00         | 0.75     | 1.00              | 15                                   | 5.13       | 6.00         | 4.80           | 5.00             | 0.50     | 1.00              |
| sf_happy_person                                       | 9 | 1.44          | 1.00            | 1.44       | 1.00         | 1.00     | 1.00              | 15                                   | 1.53       | 1.00         | 1.67           | 2.00             | 0.50     | 1.00              |
| sf_feel_tired                                         | 9 | 5.00          | 5.00            | 4.22       | 5.00         | 0.12     | 1.00              | 15                                   | 4.33       | 5.00         | 4.47           | 4.00             | 0.85     | 1.00              |
| sf_emo_visiting                                       | 9 | 4.89          | 5.00            | 4.44       | 5.00         | 0.50     | 1.00              | 15                                   | 4.73       | 5.00         | 4.27           | 4.00             | 0.24     | 1.00              |
| sf_sick_easier                                        | 9 | 4.78          | 5.00            | 4.33       | 5.00         | 0.50     | 1.00              | 15                                   | 4.33       | 5.00         | 4.33           | 5.00             | 1.00     | 1.00              |
| sf_healthy_as_any                                     | 9 | 1.78          | 1.00            | 1.78       | 1.00         | 1.00     | 1.00              | 15                                   | 1.67       | 1.00         | 2.47           | 2.00             | 0.14     | 1.00              |
| sf_expect_worse                                       | 9 | 3.89          | 5.00            | 3.33       | 5.00         | 0.53     | 1.00              | 15                                   | 3.40       | 4.00         | 2.93           | 3.00             | 0.34     | 1.00              |
| sf_health_excel                                       | 9 | 1.56          | 2.00            | 2.33       | 1.00         | 0.25     | 1.00              | 15                                   | 1.93       | 1.00         | 2.13           | 2.00             | 0.44     | 1.00              |
|                                                       |   |               |                 |            |              |          |                   |                                      |            |              |                |                  |          |                   |
| SF-36 Summary Score                                   | N | Baseline Mean | Baseline Median | Prior Mean | Prior Median | p-value* | Adjusted p-value† | N                                    | Prior Mean | Prior Median | Following Mean | Following Median | p-value* | Adjusted p-value† |
| Physical Component Summary                            | 9 | 71.6          | 74.5            | 63.4       | 67.4         | 0.30     | 0.60              | 15                                   | 70.4       | 80.4         | 59.9           | 61.6             | 0.15     | 0.30              |
| Mental Component Summary                              | 9 | 94.8          | 93.7            | 95.5       | 95.1         | 1.00     | 1.00              | 15                                   | 93.0       | 91.1         | 88.2           | 93.1             | 0.39     | 0.78              |

| Extrafoveal CNV subgroup (n=30)                               |    |               |                 |            |              |          |                   |                                      |            |              |                |                  |              |                   |
|---------------------------------------------------------------|----|---------------|-----------------|------------|--------------|----------|-------------------|--------------------------------------|------------|--------------|----------------|------------------|--------------|-------------------|
| Comparison of mean and median SF-36 scores                    |    |               |                 |            |              |          |                   |                                      |            |              |                |                  |              |                   |
| Baseline to prior to CNV diagnosis                            |    |               |                 |            |              |          |                   | Prior to and following CNV diagnosis |            |              |                |                  |              |                   |
| SF-36 Item                                                    | N  | Baseline Mean | Baseline Median | Prior Mean | Prior Median | p-value* | Adjusted p-value† | N                                    | Prior Mean | Prior Median | Following Mean | Following Median | p-value*     | Adjusted p-value† |
| sf_health                                                     | 20 | 2.45          | 2.50            | 2.75       | 3.00         | 0.28     | 1.00              | 28                                   | 2.64       | 3.00         | 2.71           | 3.00             | 0.86         | 1.00              |
| sf_health_year_ago                                            | 20 | 3.10          | 3.00            | 3.15       | 3.00         | 1.00     | 1.00              | 28                                   | 3.18       | 3.00         | 3.21           | 3.00             | 1.00         | 1.00              |
| sf_vigorous                                                   | 20 | 1.65          | 2.00            | 1.75       | 2.00         | 0.74     | 1.00              | 28                                   | 1.79       | 2.00         | 1.79           | 2.00             | 1.00         | 1.00              |
| sf_moderate                                                   | 20 | 2.15          | 2.00            | 2.10       | 2.00         | 1.00     | 1.00              | 28                                   | 2.11       | 2.00         | 2.36           | 2.50             | 0.21         | 1.00              |
| sf_lifting                                                    | 20 | 2.65          | 3.00            | 2.40       | 2.00         | 0.12     | 1.00              | 28                                   | 2.36       | 2.00         | 2.39           | 2.50             | 1.00         | 1.00              |
| sf_several_stairs                                             | 20 | 2.10          | 2.00            | 1.85       | 2.00         | 0.36     | 1.00              | 28                                   | 1.89       | 2.00         | 1.93           | 2.00             | 0.96         | 1.00              |
| sf_stairs                                                     | 20 | 2.45          | 2.50            | 2.35       | 2.00         | 0.75     | 1.00              | 28                                   | 2.43       | 2.50         | 2.43           | 2.50             | 1.00         | 1.00              |
| sf_stooping                                                   | 20 | 2.25          | 2.00            | 2.15       | 2.00         | 0.75     | 1.00              | 28                                   | 2.14       | 2.00         | 2.18           | 2.00             | 1.00         | 1.00              |
| sf_walk_mile                                                  | 18 | 2.11          | 2.00            | 1.78       | 2.00         | 0.18     | 1.00              | 28                                   | 1.86       | 2.00         | 1.86           | 2.00             | 1.00         | 1.00              |
| sf_walk_sev_blocks                                            | 20 | 2.35          | 2.50            | 2.15       | 2.00         | 0.36     | 1.00              | 28                                   | 2.21       | 2.00         | 2.21           | 2.50             | 0.88         | 1.00              |
| sf_walk_one_block                                             | 20 | 2.65          | 3.00            | 2.50       | 3.00         | 0.53     | 1.00              | 28                                   | 2.54       | 3.00         | 2.50           | 3.00             | 1.00         | 1.00              |
| sf_dressing                                                   | 20 | 2.95          | 3.00            | 2.75       | 3.00         | 0.12     | 1.00              | 28                                   | 2.68       | 3.00         | 2.75           | 3.00             | 0.62         | 1.00              |
| sf_cut_down                                                   | 20 | 1.85          | 2.00            | 1.70       | 2.00         | 0.45     | 1.00              | 28                                   | 1.68       | 2.00         | 1.79           | 2.00             | 0.51         | 1.00              |
| sf_accomplished_less                                          | 20 | 1.70          | 2.00            | 1.60       | 2.00         | 0.73     | 1.00              | 28                                   | 1.61       | 2.00         | 1.57           | 2.00             | 1.00         | 1.00              |
| sf_limited_kind                                               | 20 | 1.70          | 2.00            | 1.65       | 2.00         | 1.00     | 1.00              | 28                                   | 1.71       | 2.00         | 1.71           | 2.00             | 1.00         | 1.00              |
| sf_work                                                       | 20 | 1.60          | 2.00            | 1.60       | 2.00         | 1.00     | 1.00              | 28                                   | 1.61       | 2.00         | 1.61           | 2.00             | 1.00         | 1.00              |
| sf_emo_work                                                   | 20 | 1.90          | 2.00            | 1.95       | 2.00         | 1.00     | 1.00              | 28                                   | 1.96       | 2.00         | 1.86           | 2.00             | 0.25         | 1.00              |
| sf_emo_accomplished                                           | 20 | 1.85          | 2.00            | 1.90       | 2.00         | 1.00     | 1.00              | 28                                   | 1.96       | 2.00         | 1.82           | 2.00             | 0.12         | 1.00              |
| sf_emo_careful                                                | 20 | 1.95          | 2.00            | 1.95       | 2.00         | 1.00     | 1.00              | 28                                   | 1.96       | 2.00         | 1.86           | 2.00             | 0.25         | 1.00              |
| sf_emo_social                                                 | 20 | 1.30          | 1.00            | 1.80       | 2.00         | 0.06     | 1.00              | 28                                   | 1.54       | 1.00         | 1.89           | 1.50             | 0.07         | 1.00              |
| sf_bodily_pain                                                | 20 | 2.25          | 2.00            | 2.90       | 3.00         | 0.08     | 1.00              | 28                                   | 2.68       | 3.00         | 2.21           | 2.00             | 0.06         | 1.00              |
| sf_pain_work                                                  | 20 | 1.40          | 1.00            | 1.95       | 1.50         | 0.07     | 1.00              | 28                                   | 1.82       | 1.00         | 1.75           | 1.00             | 0.60         | 1.00              |
| sf_full_of_pep                                                | 20 | 3.35          | 3.00            | 3.05       | 3.00         | 0.41     | 1.00              | 28                                   | 2.75       | 2.00         | 3.32           | 3.50             | 0.14         | 1.00              |
| sf_very_nervous                                               | 20 | 5.20          | 5.00            | 5.45       | 6.00         | 0.53     | 1.00              | 28                                   | 5.39       | 6.00         | 5.25           | 5.50             | 0.40         | 1.00              |
| sf_down_dumps                                                 | 20 | 5.65          | 6.00            | 5.70       | 6.00         | 1.00     | 1.00              | 28                                   | 5.64       | 6.00         | 5.46           | 6.00             | 0.27         | 1.00              |
| sf_calm_peaceful                                              | 20 | 2.70          | 2.00            | 2.70       | 2.00         | 0.90     | 1.00              | 28                                   | 2.54       | 2.00         | 2.46           | 2.00             | 0.85         | 1.00              |
| sf_lot_of_energy                                              | 20 | 3.20          | 3.00            | 3.05       | 3.50         | 1.00     | 1.00              | 28                                   | 3.11       | 3.00         | 3.46           | 3.00             | 0.15         | 1.00              |
| sf_downhearted                                                | 20 | 5.40          | 5.50            | 5.30       | 5.50         | 0.84     | 1.00              | 28                                   | 5.39       | 6.00         | 5.29           | 5.00             | 0.62         | 1.00              |
| sf_worn_out                                                   | 20 | 4.95          | 5.00            | 4.70       | 5.00         | 0.12     | 1.00              | 28                                   | 4.61       | 5.00         | 4.46           | 5.00             | 0.47         | 1.00              |
| sf_happy_person                                               | 20 | 2.25          | 2.00            | 2.40       | 2.00         | 0.69     | 1.00              | 28                                   | 2.32       | 2.00         | 2.50           | 2.00             | 0.48         | 1.00              |
| sf_feel_tired                                                 | 20 | 4.70          | 5.00            | 4.45       | 4.00         | 0.23     | 1.00              | 28                                   | 4.14       | 4.00         | 4.43           | 5.00             | 0.10         | 1.00              |
| sf_emo_visiting                                               | 20 | 4.20          | 4.50            | 4.20       | 4.50         | 0.89     | 1.00              | 28                                   | 4.21       | 4.00         | 4.21           | 5.00             | 1.00         | 1.00              |
| sf_sick_easier                                                | 20 | 4.15          | 4.00            | 4.45       | 5.00         | 0.34     | 1.00              | 28                                   | 4.36       | 5.00         | 4.25           | 5.00             | 0.75         | 1.00              |
| sf_healthy_as_any                                             | 20 | 2.45          | 2.00            | 2.05       | 2.00         | 0.08     | 1.00              | 28                                   | 2.25       | 2.00         | 2.29           | 2.00             | 0.77         | 1.00              |
| sf_expect_worse                                               | 20 | 4.10          | 4.00            | 3.85       | 4.00         | 0.46     | 1.00              | 28                                   | 3.93       | 4.00         | 3.86           | 4.00             | 0.81         | 1.00              |
| sf_health_excel                                               | 20 | 2.55          | 2.00            | 2.45       | 2.00         | 0.46     | 1.00              | 28                                   | 2.39       | 2.00         | 2.71           | 2.00             | 0.24         | 1.00              |
|                                                               |    |               |                 |            |              |          |                   |                                      |            |              |                |                  |              |                   |
| SF-36 Summary Score                                           | N  | Baseline Mean | Baseline Median | Prior Mean | Prior Median | p-value* | Adjusted p-value† | N                                    | Prior Mean | Prior Median | Following Mean | Following Median | p-value*     | Adjusted p-value† |
| Physical Component Summary                                    | 20 | 61.7          | 67.5            | 51.2       | 50.4         | 0.14     | 0.28              | 28                                   | 52.6       | 54.9         | 58.2           | 64.1             | 0.31         | 0.62              |
| Mental Component Summary                                      | 20 | 84.3          | 90.3            | 88.1       | 93.8         | 0.22     | 0.44              | 28                                   | 89.8       | 93.6         | 80.2           | 87.3             | <b>0.002</b> | <b>0.004</b>      |
| * Paired t-test (n≥30) or Wilcoxon signed-rank test (n<30)    |    |               |                 |            |              |          |                   |                                      |            |              |                |                  |              |                   |
| † Bonferroni adjustment for multiple comparisons              |    |               |                 |            |              |          |                   |                                      |            |              |                |                  |              |                   |
| Bold font indicates statistical significance (p value < 0.05) |    |               |                 |            |              |          |                   |                                      |            |              |                |                  |              |                   |
